# Supplementary material for: Anticancer and antibacterial flavonoids from the callus of Ampelopsis grossedentata; a new weapon to mitigate the proliferation of cancer cells and bacteria
Source: Royal Society of Chemistry journal article supplement (doi:10.1039/d2ra03437a), 2022-01-01
Supplement: d2ra03437a1.pdf [file d2ra03437a1.pdf]

**Anticancer and antibacterial flavonoids from callus of *Ampelopsis grossedentata*;  
a new weapon to mitigate the proliferation of cancer cells and bacteria**

Yu Li<sup>a,†</sup>, Pachaiyappan Saravana Kumar<sup>a,\*</sup>, Shengquan Tan<sup>b,†</sup>, Chuying Huang<sup>b</sup>,  
ZhixinXiang<sup>c</sup>, Jiao Qiu<sup>b</sup>, Xuhui Tan<sup>a</sup>, Jianqun Luo<sup>d</sup>, Meijun He<sup>a,\*</sup>

<sup>a</sup>*Institute of Chinese Herbal Medicines, Hubei Academy of Agricultural Sciences,  
Enshi 445000, China*

<sup>b</sup>*Department of Central Hospital of Tujia and Miao Autonomous Prefecture, Enshi  
445000, China*

<sup>c</sup>*State Key Laboratory of Hybrid Rice, College of Life Sciences, Wuhan University,  
Wuhan 430072, China*

<sup>d</sup>*Enshi selenium commander and ecological agriculture company, Enshi 445000,  
China*

<sup>†</sup>*These authors contributed equally to this work*

---

**Corresponding authors:**

Dr Meijun He<sup>\*</sup>

*Institute of Chinese Herbal Medicines, Hubei Academy of Agricultural Sciences, No.  
253 Xueyuan road, Enshi 445000, China*

Email: 840940513@qq.com, Tel.: +86-07188416543

Dr Pachaiyappan Saravana Kumar<sup>\*</sup>

*Institute of Chinese Herbal Medicines, Hubei Academy of Agricultural Sciences, No.  
253 Xueyuan road, Enshi 445000, China*

Email: savanah.kumar@gmail.com, saravanakumar12deri01@loyolacollege.edu,

Tel.:+91-9962447821; +86-13711128037; ORCID ID: 0000-0003-1988-6414

## List of supporting information

| S.no.      | Content                                                                                     |
|------------|---------------------------------------------------------------------------------------------|
| Table S1   | : NMR spectroscopic data of compounds <b>2-6</b> (600 MHz, MeOD)                            |
| Table S2   | : HRESIMS data of compounds <b>2-6</b>                                                      |
| Figure S1  | : UV spectrum of angelioue ( <b>1</b> )                                                     |
| Figure S2  | : The HRESIMS spectrum of angelioue ( <b>1</b> )                                            |
| Figure S3  | : The <sup>1</sup> H NMR spectrum of angelioue ( <b>1</b> )                                 |
| Figure S4  | : The <sup>13</sup> C NMR spectrum of angelioue ( <b>1</b> )                                |
| Figure S5  | : The <sup>13</sup> C DEPT135 NMR spectrum of angelioue ( <b>1</b> )                        |
| Figure S6  | : The <sup>13</sup> C DEPT90 NMR spectrum of angelioue ( <b>1</b> )                         |
| Figure S7  | : The HSQC NMR spectrum of angelioue ( <b>1</b> )                                           |
| Figure S8  | : The ROESY NMR spectrum of angelioue ( <b>1</b> )                                          |
| Figure S9  | : The key HSQC and ROESY correlations of angelioue ( <b>1</b> )                             |
| Figure S10 | The HRESIMS spectrum of cuminatanol ( <b>2</b> )                                            |
| Figure S11 | : The <sup>1</sup> H NMR spectrum of cuminatanol ( <b>2</b> )                               |
| Figure S12 | : The <sup>13</sup> C NMR spectrum of cuminatanol ( <b>2</b> )                              |
| Figure S13 | : The <sup>13</sup> C DEPT135 NMR spectrum of cuminatanol ( <b>2</b> )                      |
| Figure S14 | : The HSQC spectrum of cuminatanol ( <b>2</b> )                                             |
| Figure S15 | : The ROESY spectrum of cuminatanol ( <b>2</b> )                                            |
| Figure S16 | : The <sup>13</sup> C DEPT90 NMR spectrum of cuminatanol ( <b>2</b> )                       |
| Figure S17 | : The HRESIMS spectrum of myricetin ( <b>3</b> )                                            |
| Figure S18 | : The <sup>1</sup> H NMR spectrum of myricetin ( <b>3</b> )                                 |
| Figure S19 | : The <sup>13</sup> C NMR spectrum of myricetin ( <b>3</b> )                                |
| Figure S20 | : The <sup>13</sup> C DEPT135 NMR spectrum of myricetin ( <b>3</b> )                        |
| Figure S21 | : The <sup>13</sup> C DEPT90 NMR spectrum of myricetin ( <b>3</b> )                         |
| Figure S22 | : The HRESIMS spectrum of epigallocatechin ( <b>4</b> )                                     |
| Figure S23 | : The <sup>1</sup> H NMR spectrum of epigallocatechin ( <b>4</b> )                          |
| Figure S24 | : The <sup>13</sup> C NMR spectrum of epigallocatechin ( <b>4</b> )                         |
| Figure S25 | : The <sup>13</sup> C DEPT135 NMR spectrum of epigallocatechin ( <b>4</b> )                 |
| Figure S26 | : The <sup>13</sup> C DEPT90 NMR spectrum of epigallocatechin ( <b>4</b> )                  |
| Figure S27 | : The HRESIMS spectrum of Taxifolin ( <b>5</b> )                                            |
| Figure S28 | : The <sup>1</sup> H NMR spectrum of Taxifolin ( <b>5</b> )                                 |
| Figure S29 | : The <sup>13</sup> C NMR spectrum of Taxifolin ( <b>5</b> )                                |
| Figure S30 | : The <sup>13</sup> C DEPT135 NMR spectrum of Taxifolin ( <b>5</b> )                        |
| Figure S31 | : The HRESIMS spectrum of dihydromyricetin ( <b>6</b> )                                     |
| Figure S32 | : The <sup>1</sup> H NMR spectrum of dihydromyricetin ( <b>6</b> )                          |
| Figure S33 | : The <sup>13</sup> C NMR spectrum of dihydromyricetin ( <b>6</b> )                         |
| Figure S34 | : The <sup>13</sup> C DEPT135 NMR spectrum of dihydromyricetin ( <b>6</b> )                 |
| Figure S35 | : HPLC Chromatogram of the isolated compound <b>1-6</b> from <i>A. grossedentata</i> callus |
| Figure S36 | : Antibacterial activity of compound <b>1-6</b> using disc diffusion assay                  |
| Figure S37 | : The tender shoots and the induced calluses of <i>A. grossedentata</i>                     |



**Continued table**

---

|     |        |               |
|-----|--------|---------------|
| 6'  | 97.33  | 5.84, d (2.1) |
| 7'  | 168.81 |               |
| 8'  | 96.52  | 5.80, d (2.1) |
| 9'  | 164.62 |               |
| 10' | 128.12 |               |
| 11' | 116.80 |               |
| 12' | 146.00 |               |
| 13' | 135.39 |               |
| 14' | 147.23 |               |
| 15' | 107.44 | 6.76 (s)      |

---

**Table S2** HRESIMS datas of compounds **2-6** (600 MHz, MeOD)

---

| <b>Compound</b>               | <b>Ion mode</b>     | <b>m/z</b> | <b>molecular formula</b>                        |
|-------------------------------|---------------------|------------|-------------------------------------------------|
| Cuminatanol ( <b>2</b> )      | [M-H] <sup>-</sup>  | 637.0831   | C <sub>30</sub> H <sub>21</sub> O <sub>16</sub> |
| Myricetin ( <b>3</b> )        | [M-H] <sup>-</sup>  | 317.0292   | C <sub>15</sub> H <sub>9</sub> O <sub>8</sub>   |
|                               | [2M-H] <sup>-</sup> | 635.0643   |                                                 |
| Epigallocatechin ( <b>4</b> ) | [M-H] <sup>-</sup>  | 305.0663   | C <sub>15</sub> H <sub>13</sub> O <sub>7</sub>  |
|                               | [2M-H] <sup>-</sup> | 611.1365   |                                                 |
| Taxifolin ( <b>5</b> )        | [M+H] <sup>+</sup>  | 305.0663   | C <sub>15</sub> H <sub>13</sub> O <sub>7</sub>  |
| Dihydromyricetin ( <b>6</b> ) | [M+H] <sup>+</sup>  | 321.0635   | C <sub>15</sub> H <sub>13</sub> O <sub>8</sub>  |

---

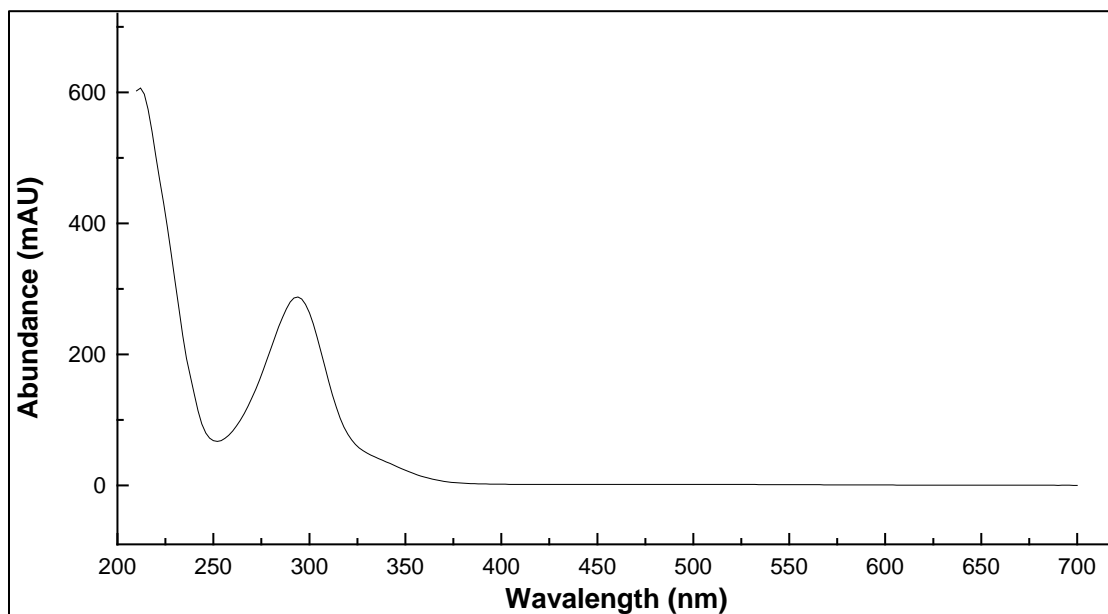

Fig.S1 UV spectrum of angelouie (1)

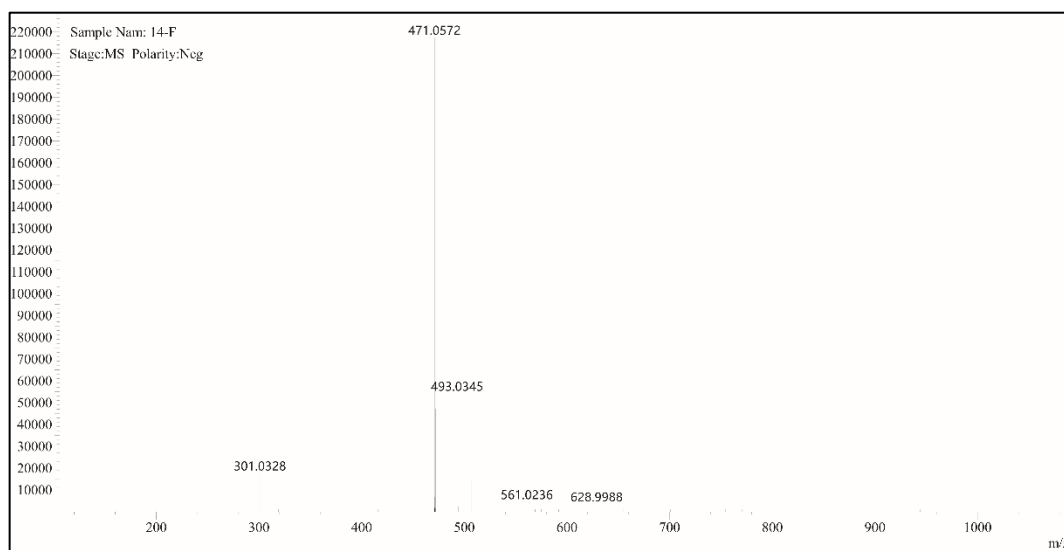

Fig.S2 The HRESIMS spectrum of angelouie (1)

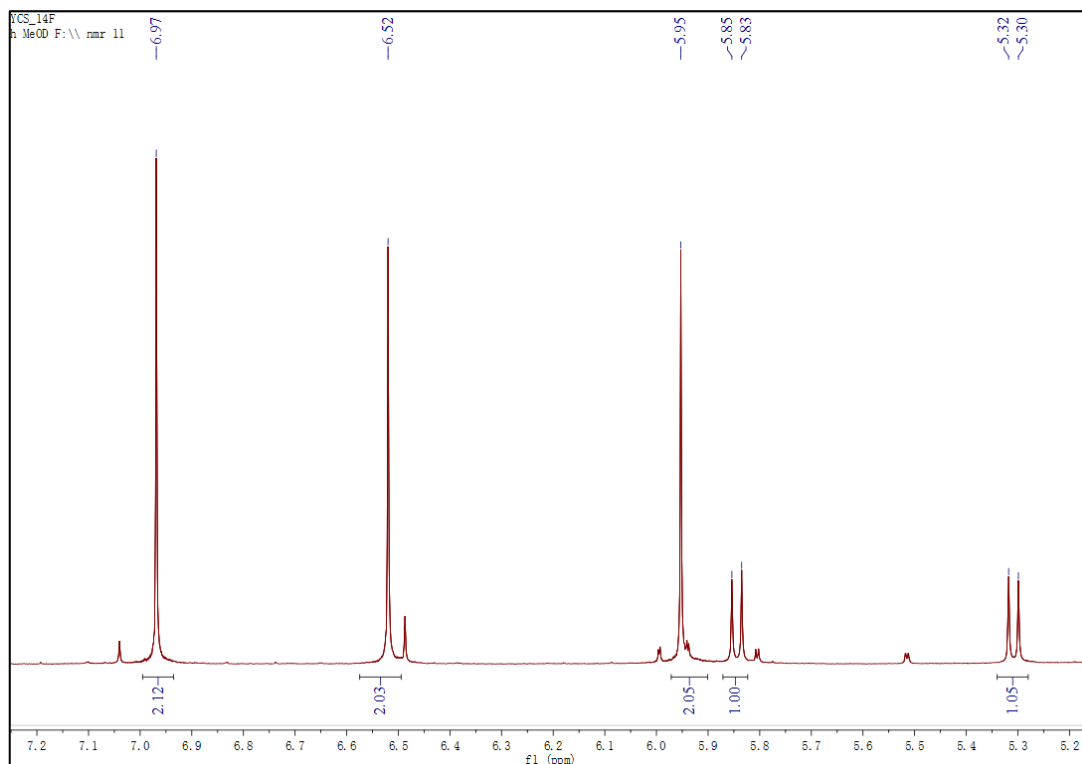

Fig.S3 The <sup>1</sup>H NMR spectrum of angelouie (1)

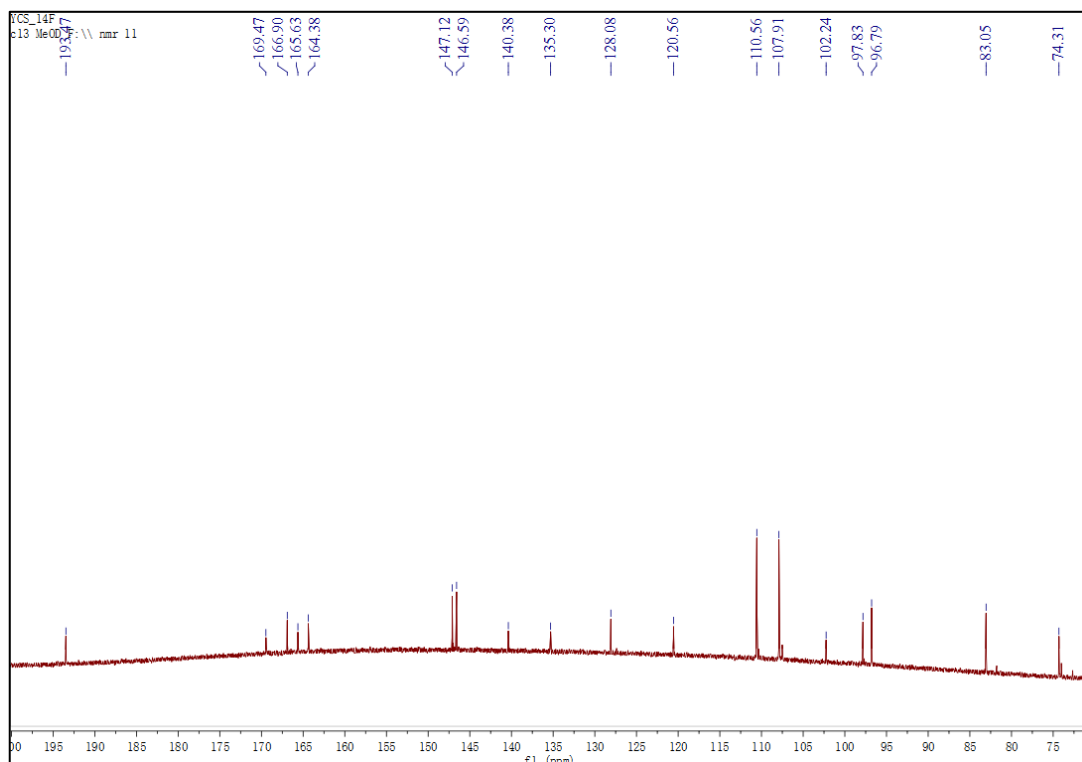

Fig.S4 The <sup>13</sup>C NMR spectrum of angelouie (1)

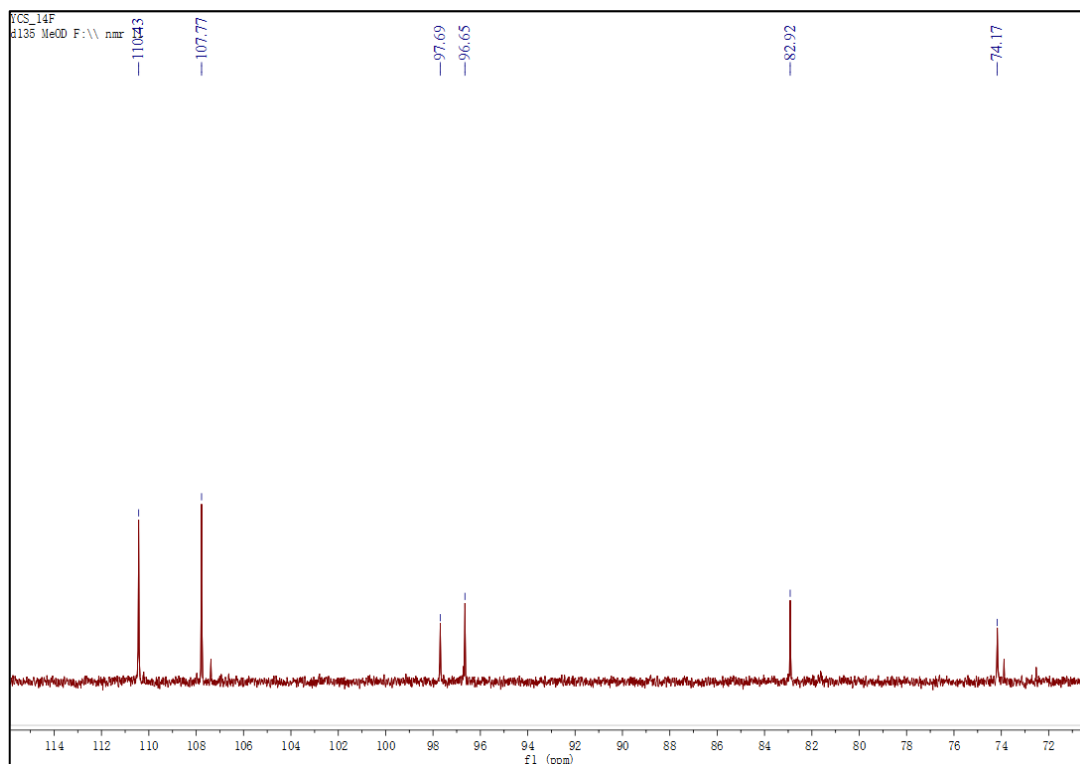

Fig.S5 The  $^{13}\text{C}$  DEPT135 NMR spectrum of angelique (1)

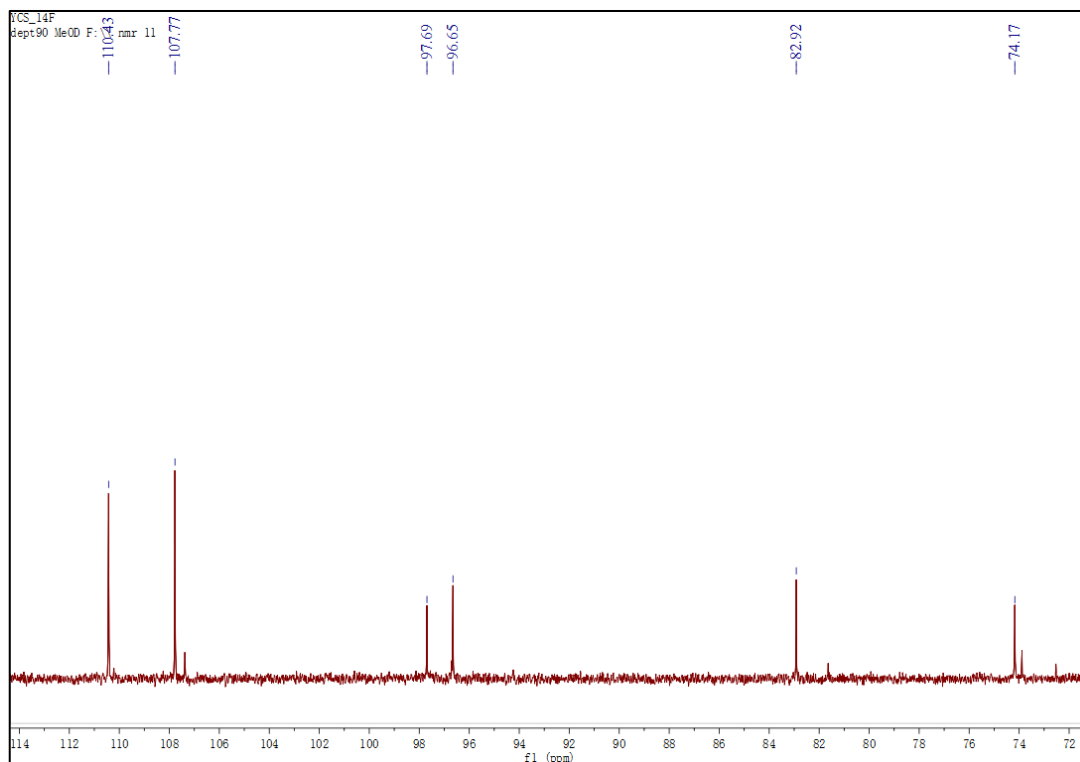

Fig.S6 The  $^{13}\text{C}$  DEPT90 NMR spectrum of angelique (1)

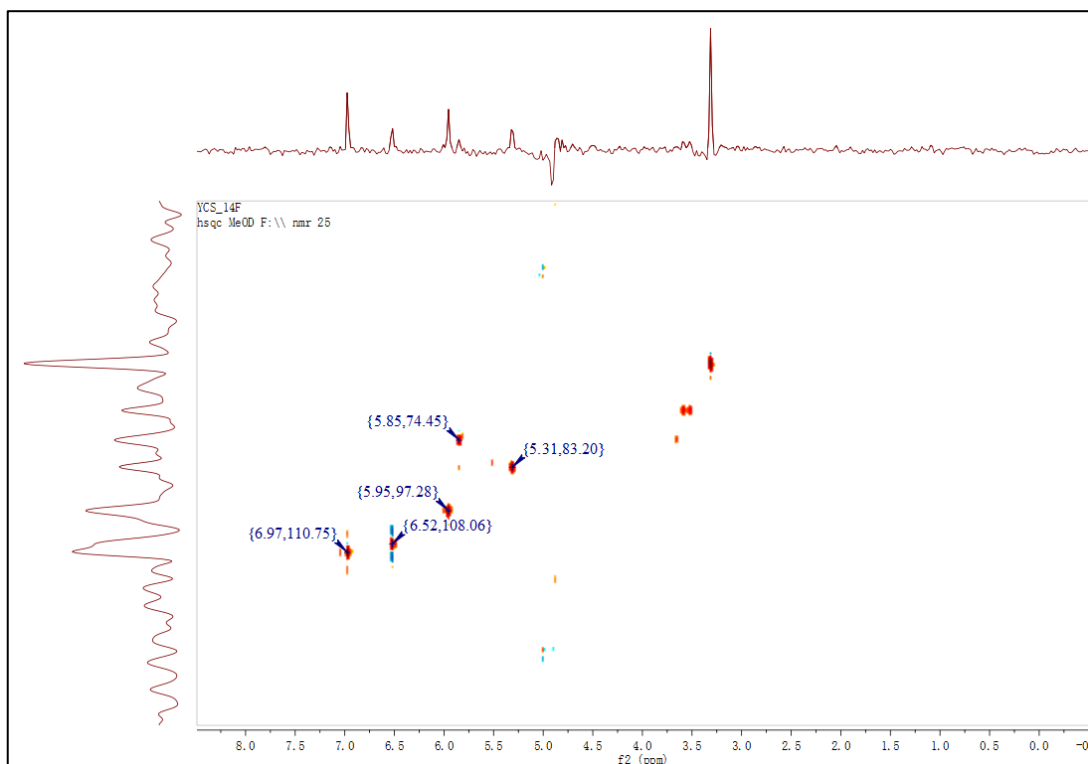

Fig.S7 The HSQC spectrum of angelique (1)

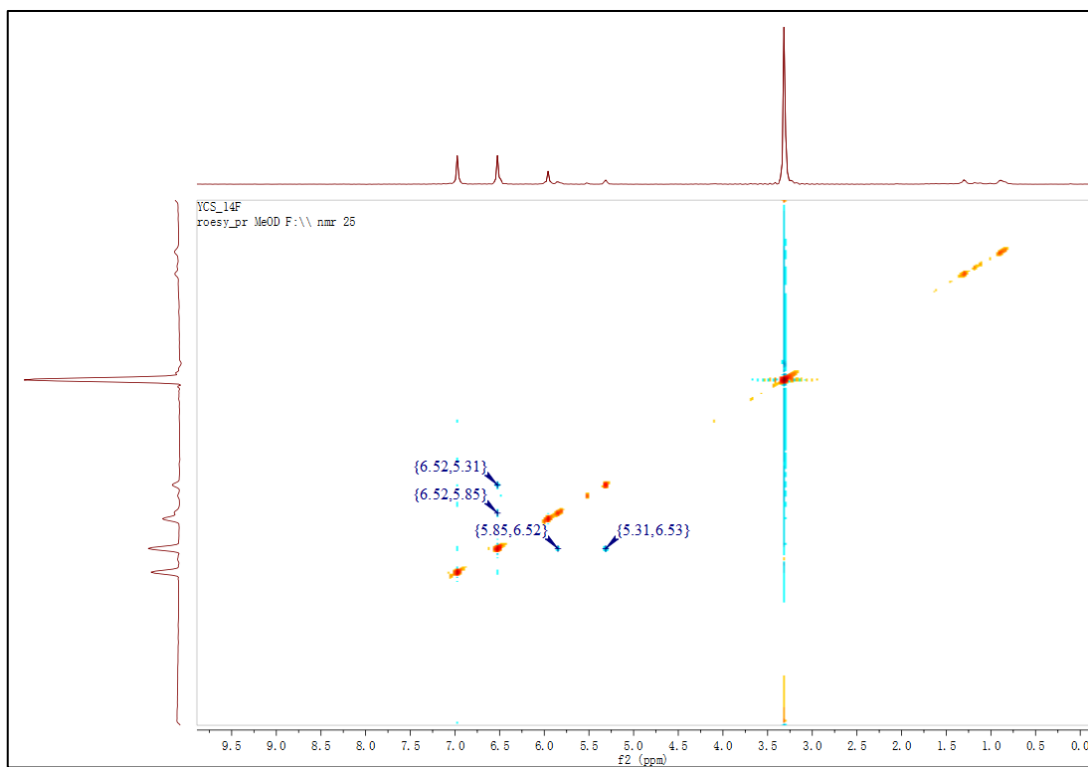

Fig.S8 The ROESY spectrum of angelique (1)



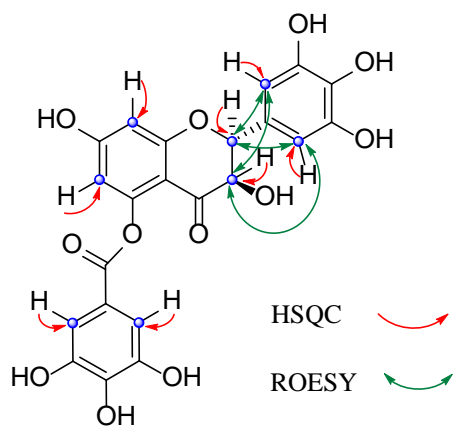

Fig. S9 Key HSQC and ROESY correlations of angelouine (1)

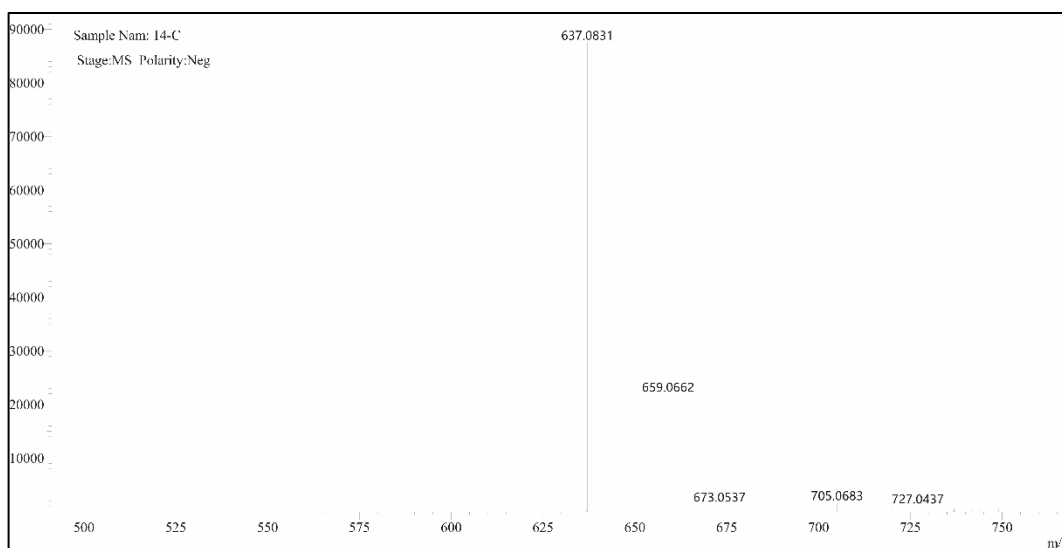

Fig.S10 The HRESIMS spectrum of cuminatanol (2)

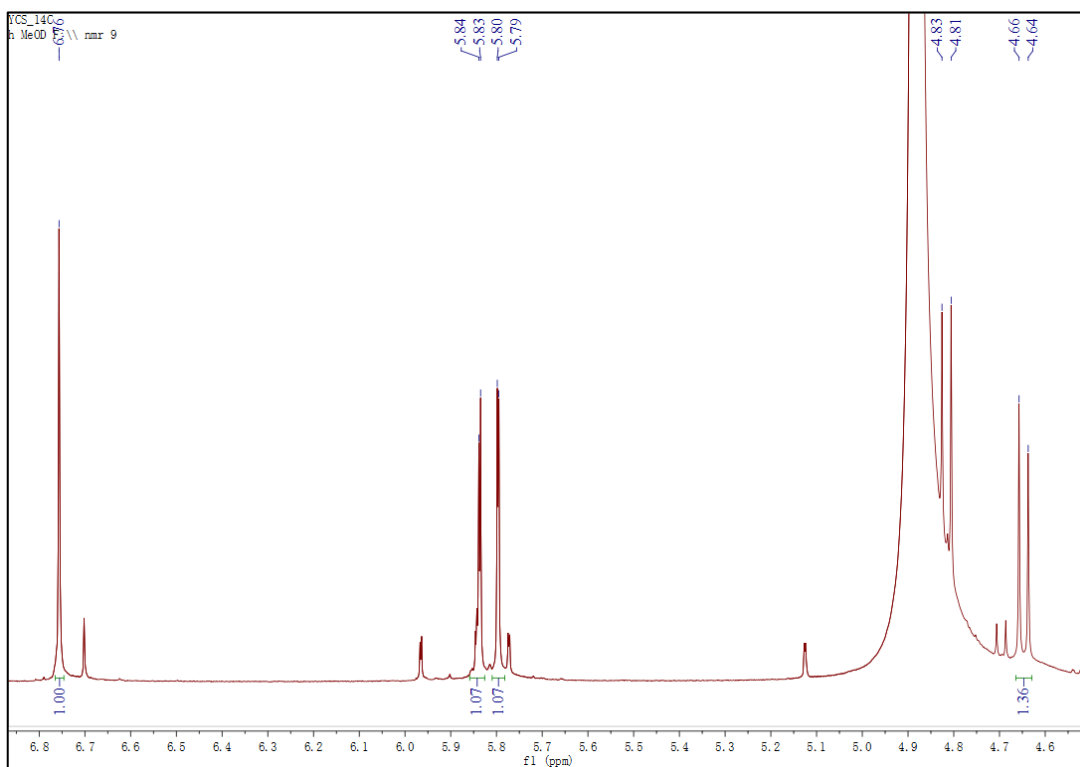

Fig.S11 The <sup>1</sup>H NMR spectrum of cuminatanol (2)

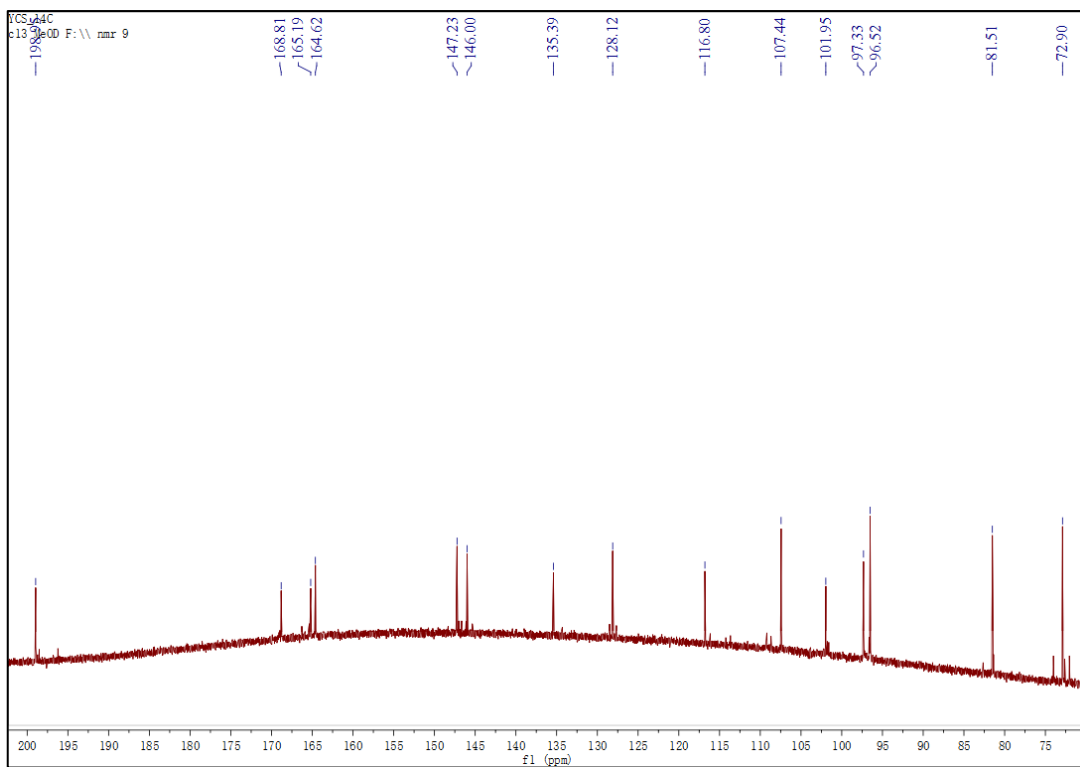

Fig.S12 The <sup>13</sup>C NMR spectrum of cuminatanol (2)

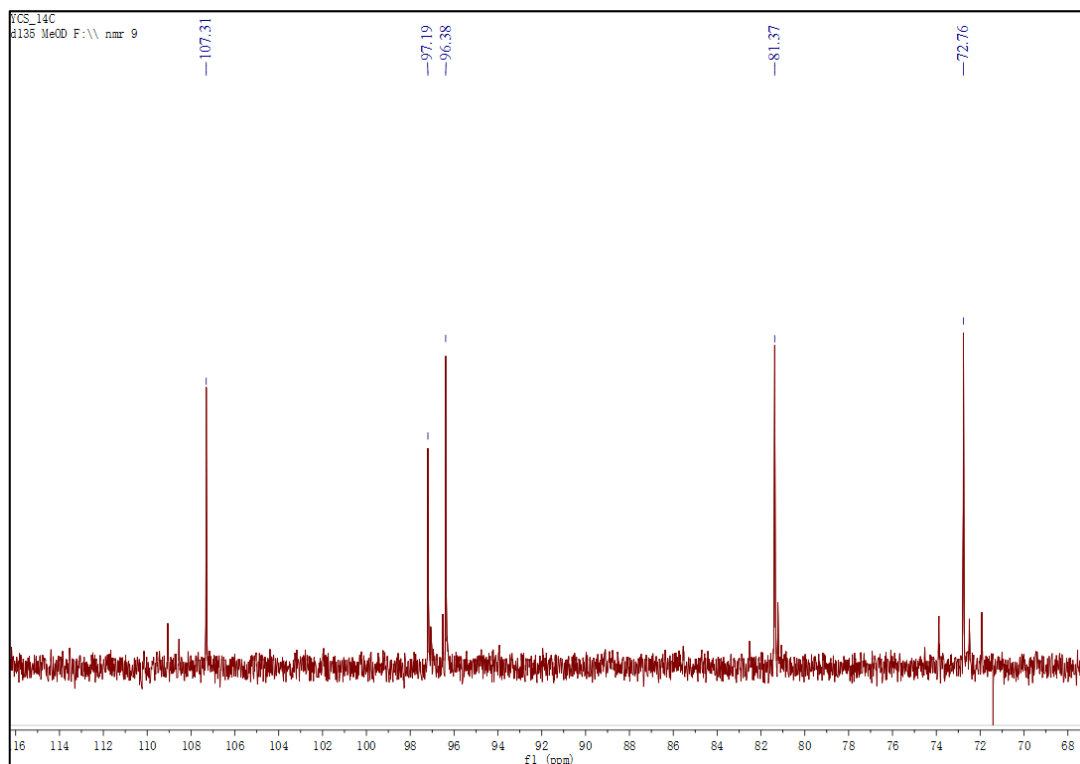

Fig.S13 The  $^{13}\text{C}$  DEPT135 NMR spectrum of cuminatanol (**2**)

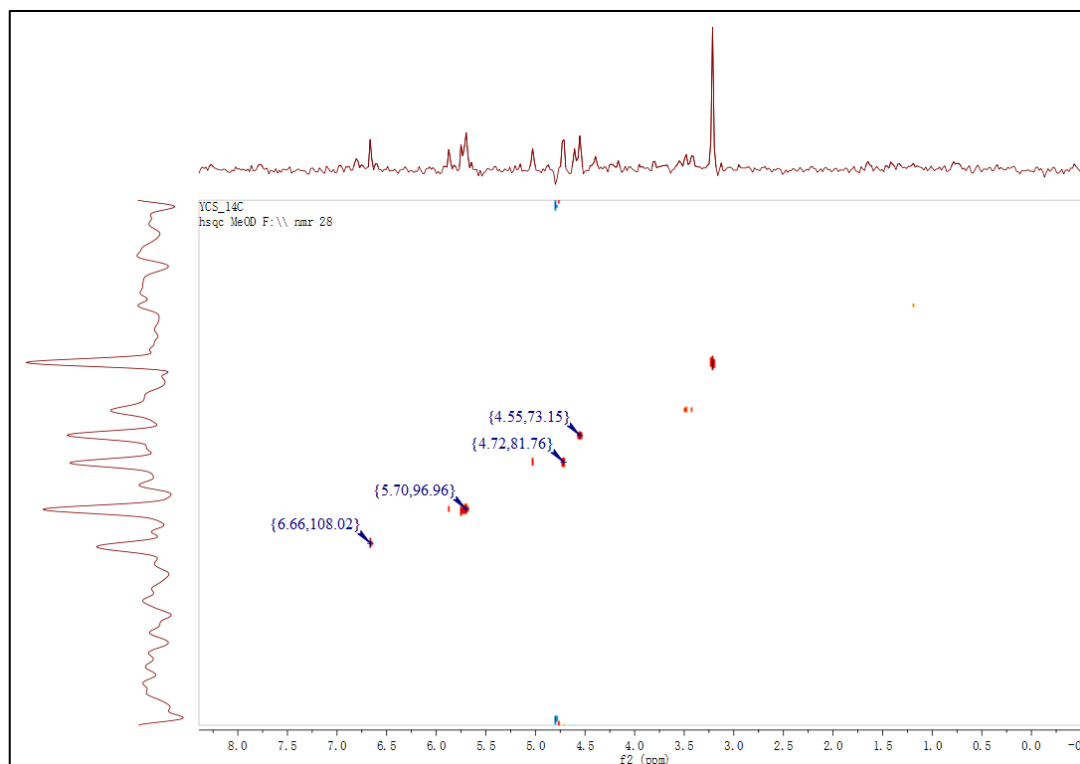

Fig.S14 The HSQC spectrum of cuminatanol (**2**)

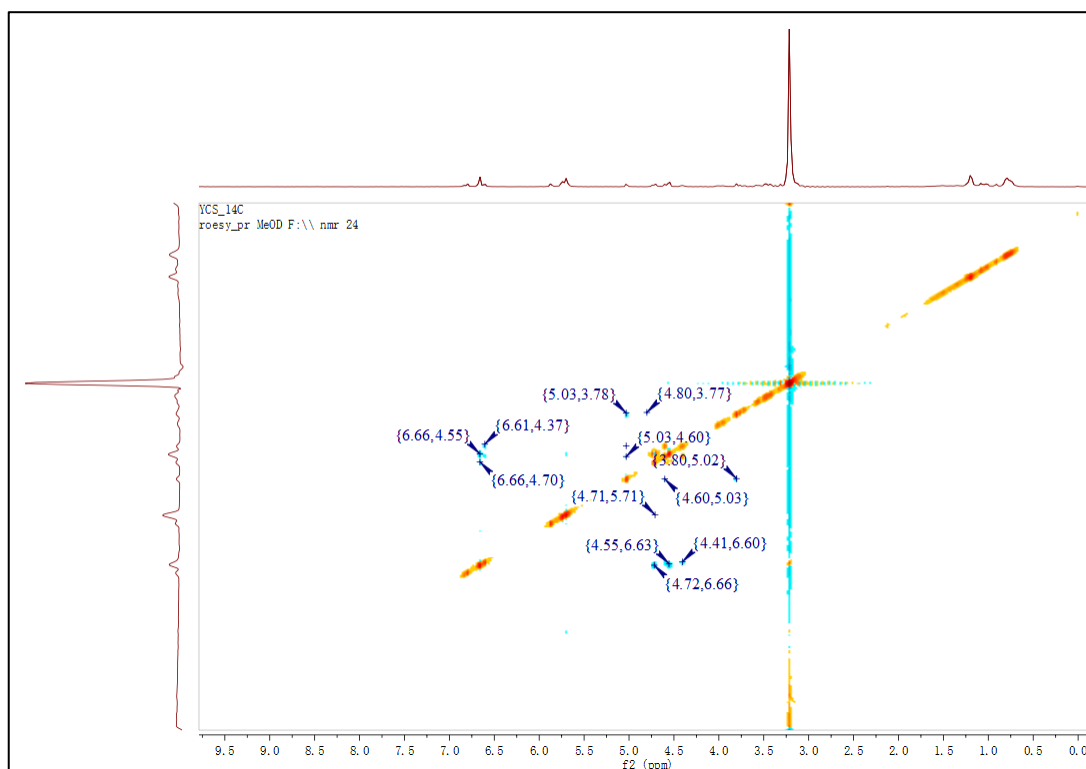

Fig.S15 The ROESY spectrum of cuminatanol (2)

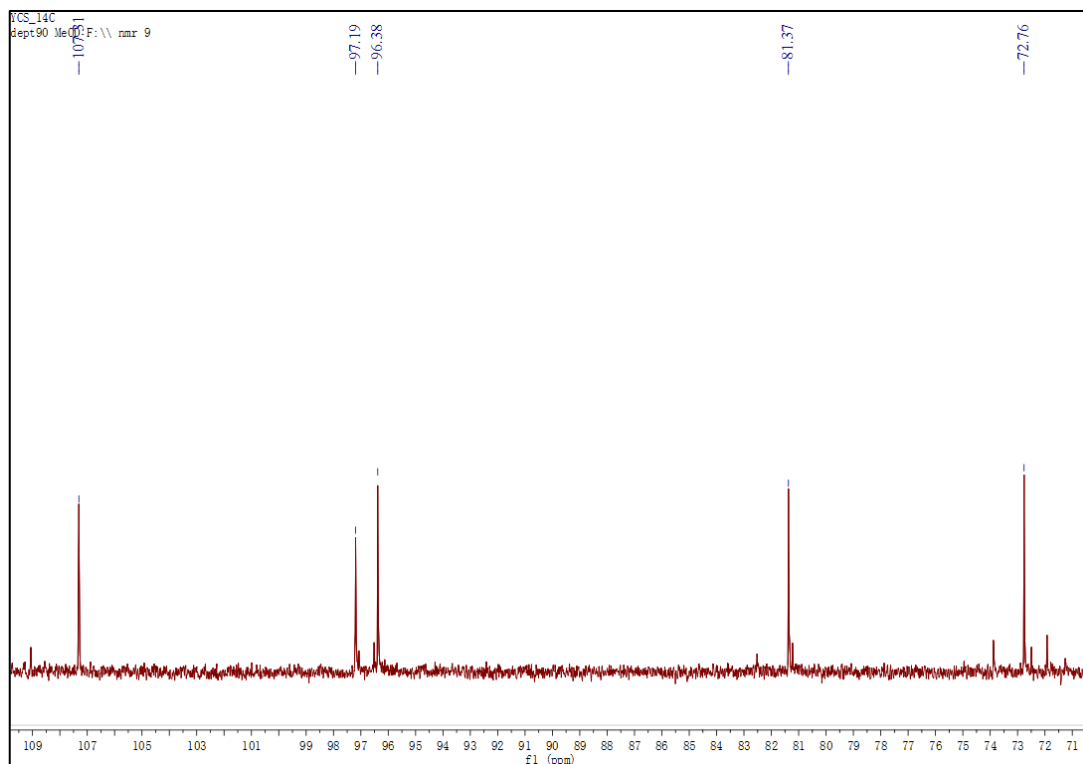

Fig.S16 The  $^{13}\text{C}$  DEPT90 NMR spectrum of cuminatanol (2)

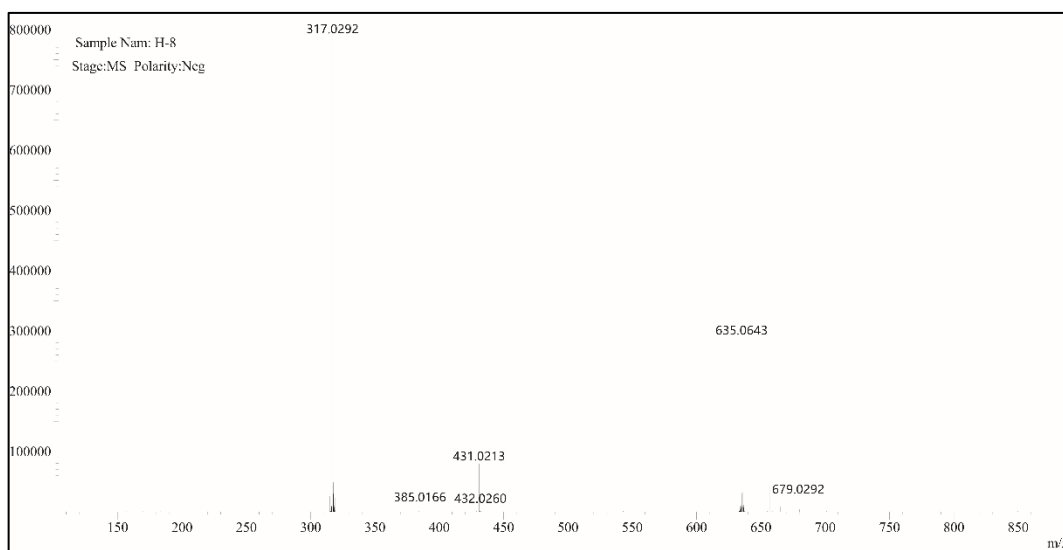

Fig.S17 The HRESIMS spectrum of myricetin (3)

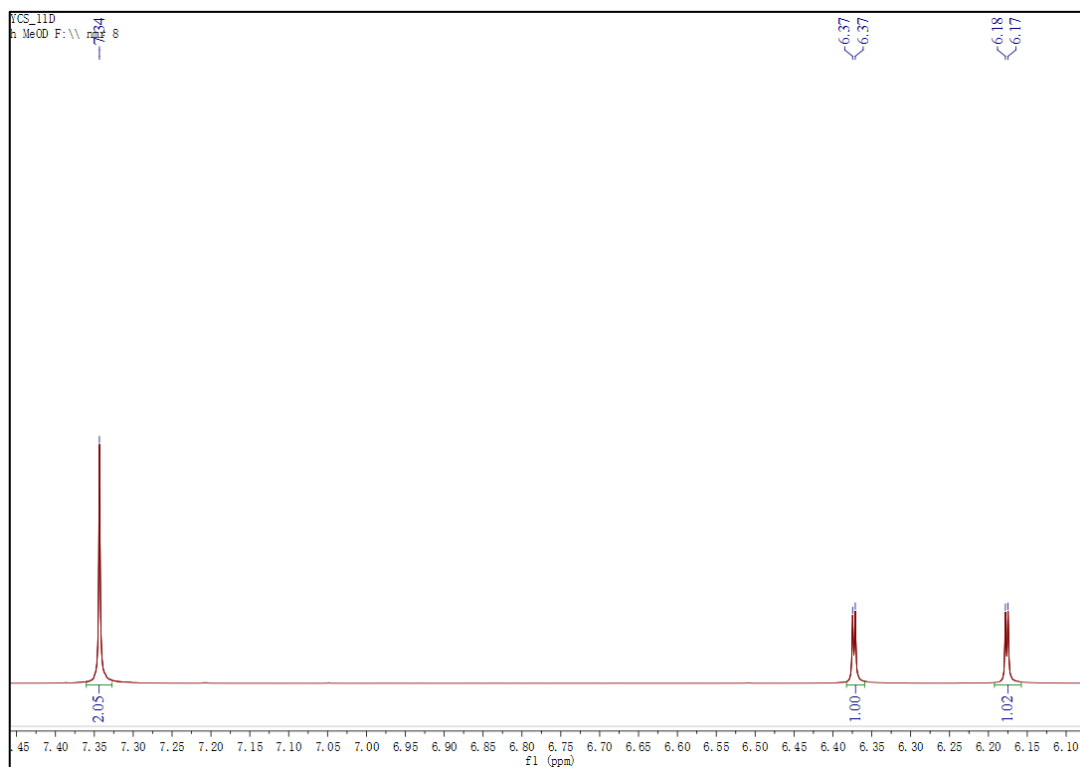

Fig.S18 The  $^1\text{H}$  NMR spectrum of myricetin (3)

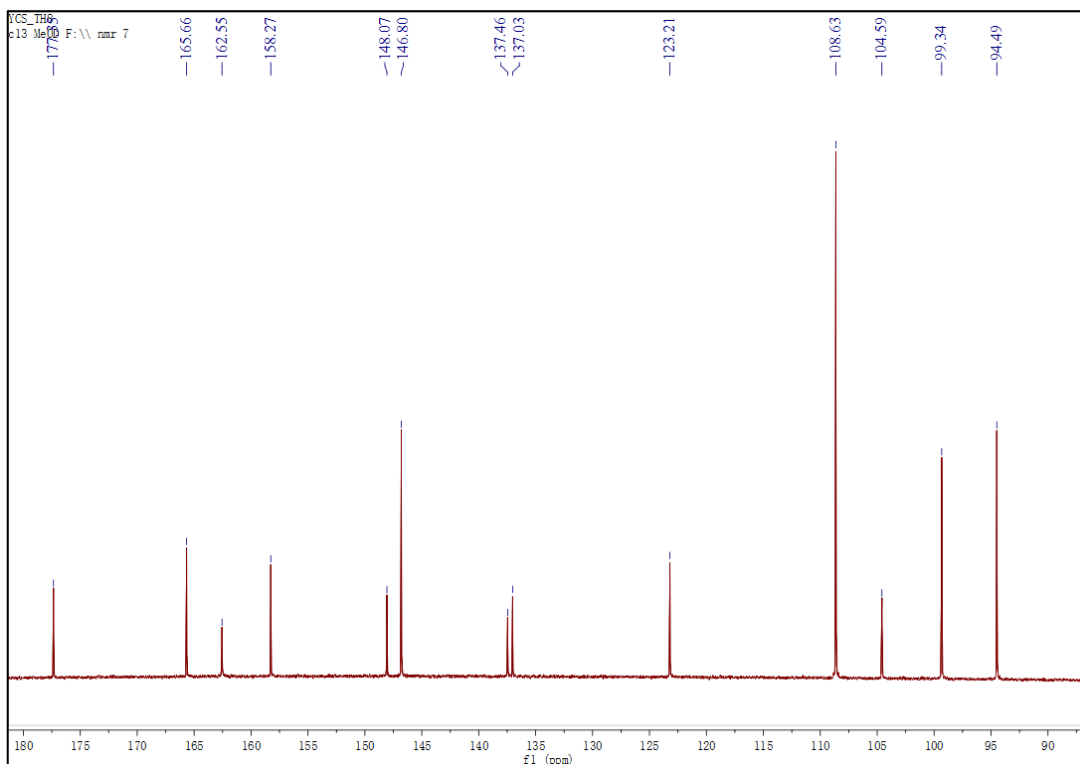

Fig.S19 The  $^{13}\text{C}$  NMR spectrum of myricetin (3)

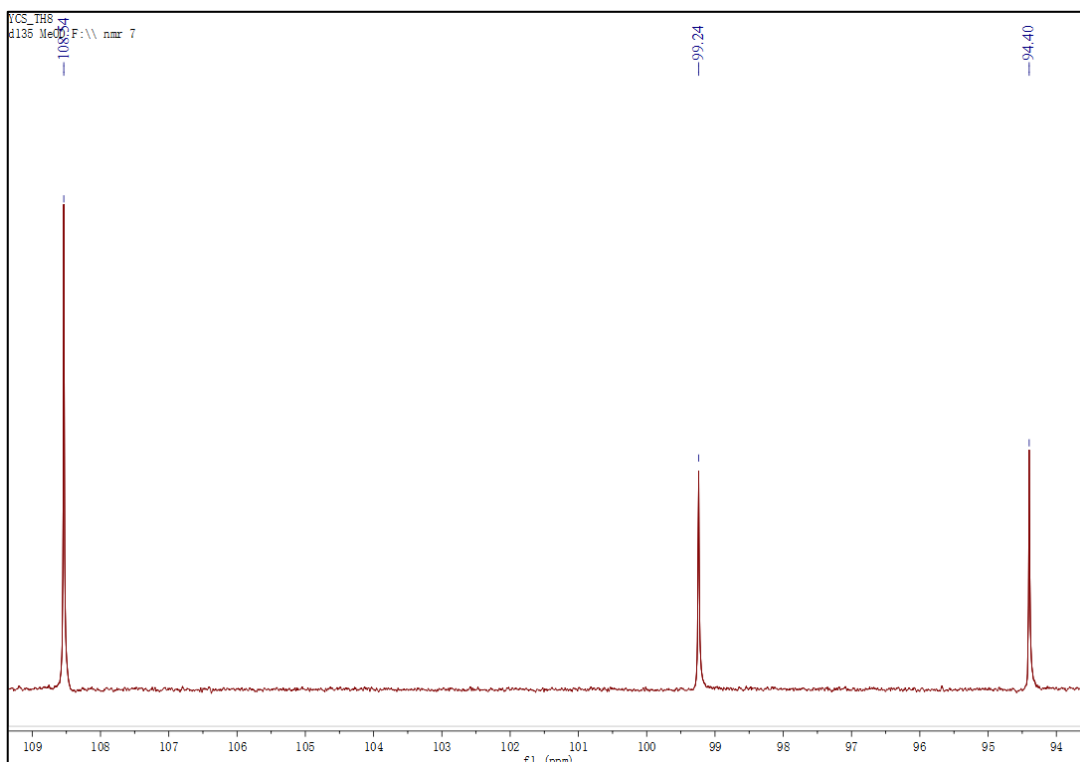

Fig.S20 The  $^{13}\text{C}$  DEPT135 NMR spectrum of myricetin (3)

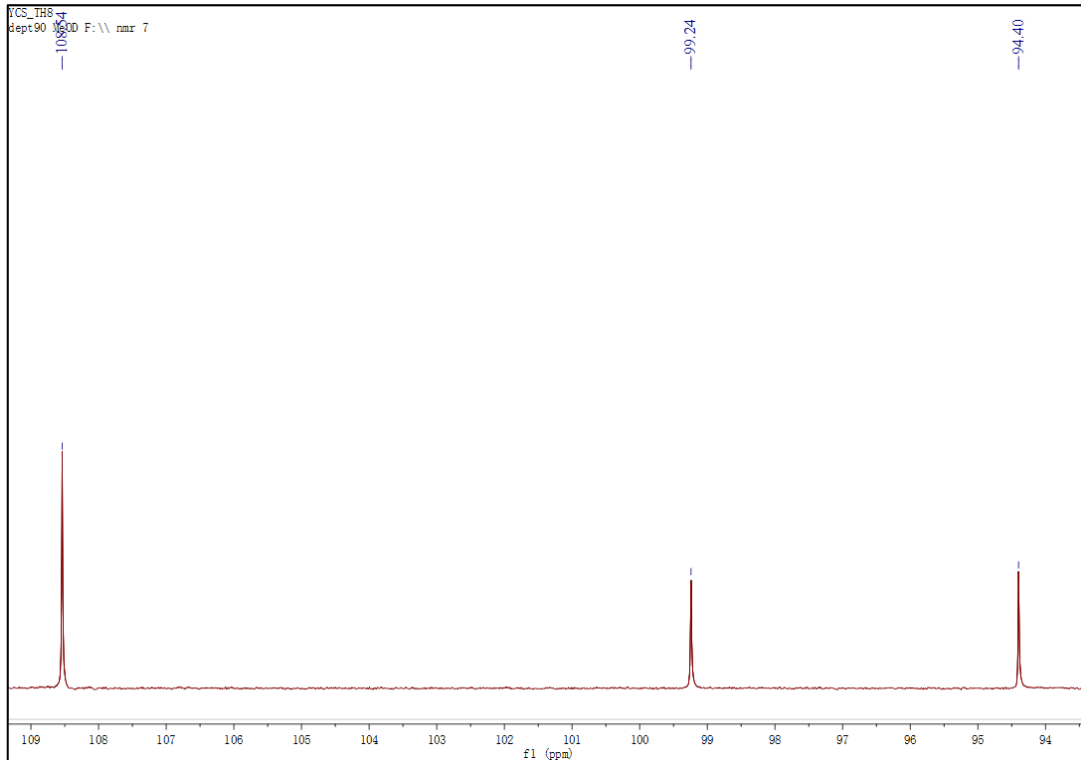

Fig.S21 The <sup>13</sup>C DEPT90 NMR spectrum of myricetin (3)

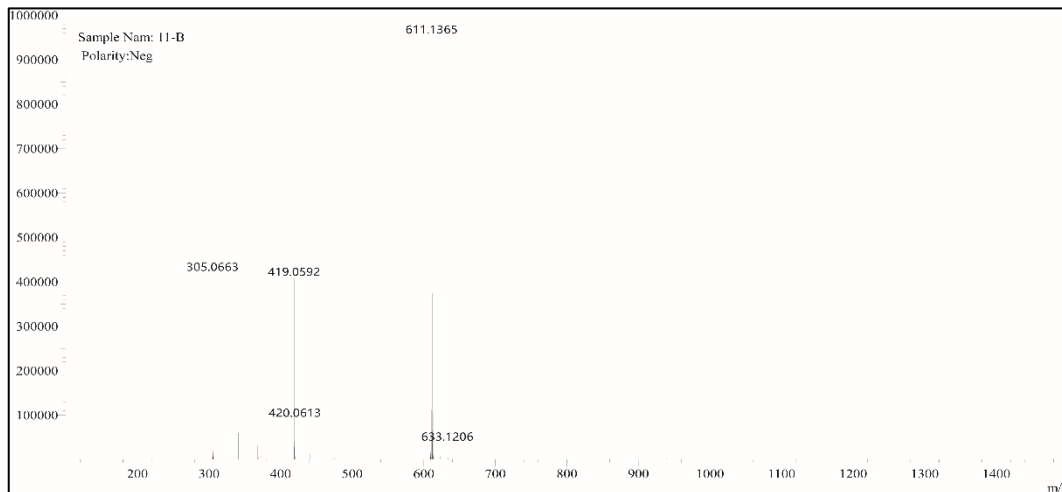

Fig.S22 The HRESIMS spectrum of epigallocatechin (4)

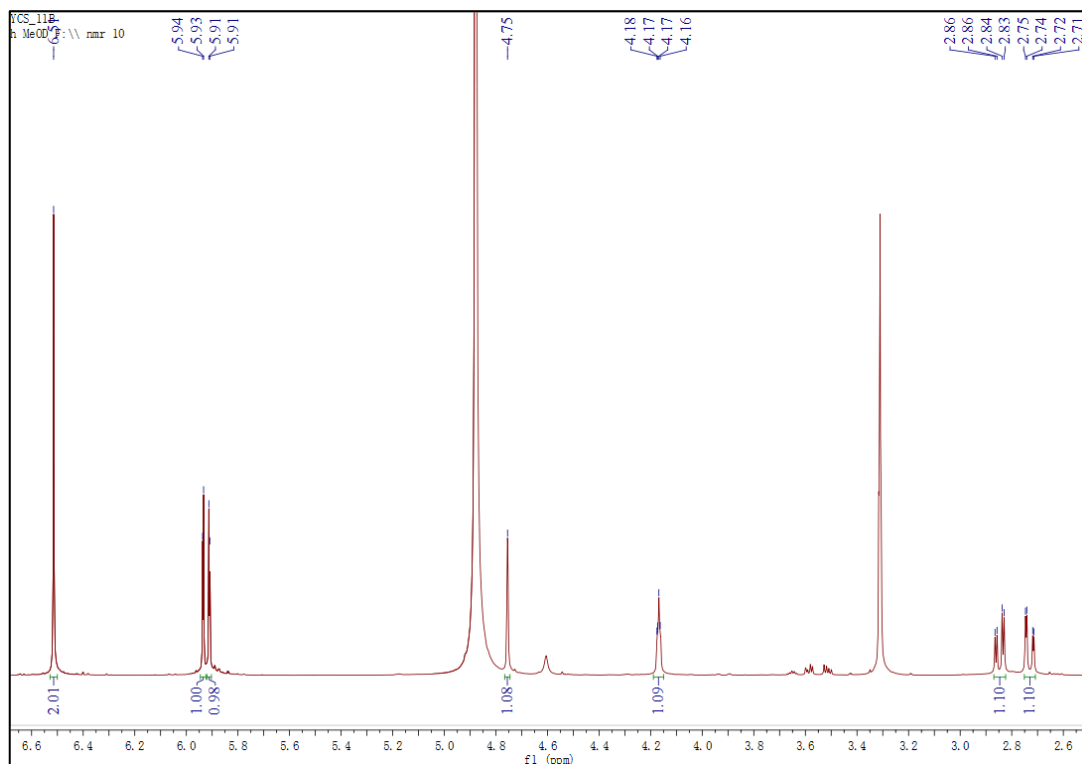

Fig.S23 The <sup>1</sup>H NMR spectrum of epigallocatechin (4)

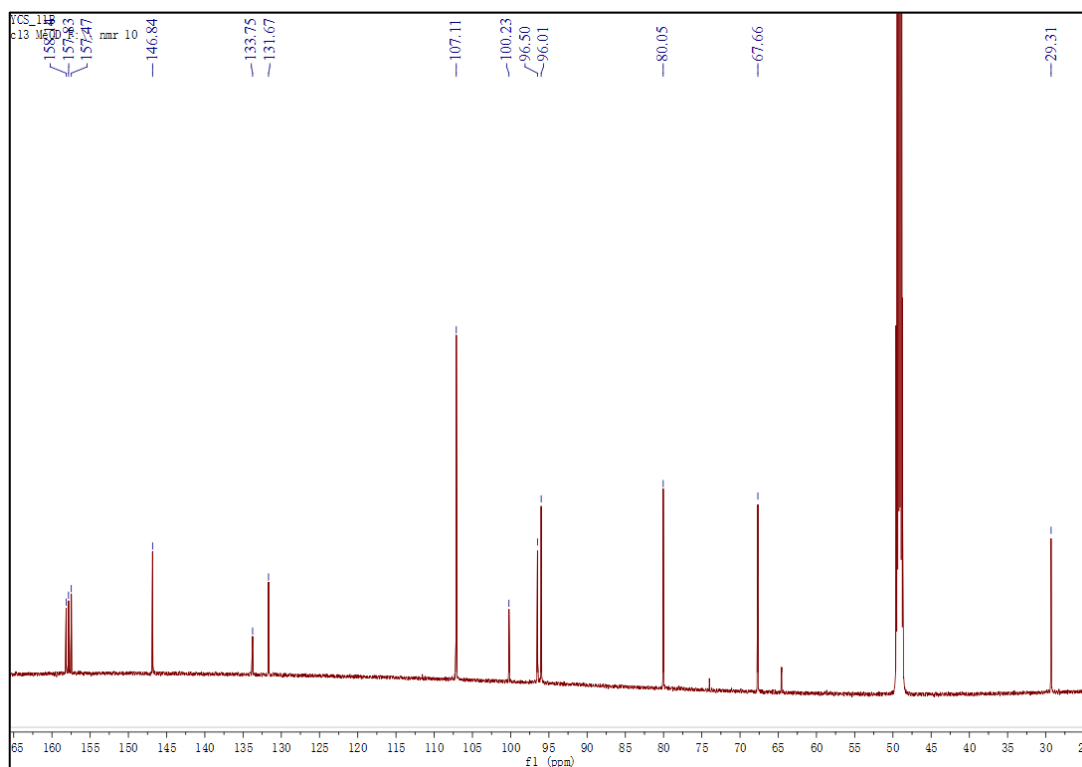

Fig.S24 The <sup>13</sup>C NMR spectrum of epigallocatechin (4)



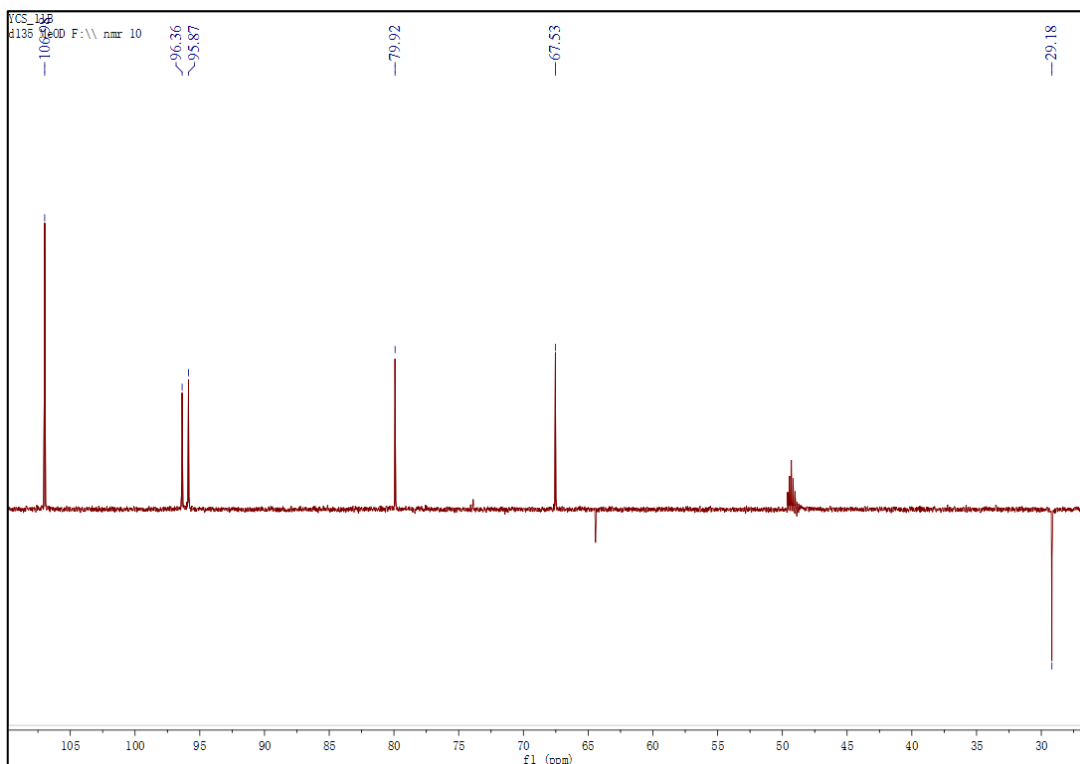

Fig.S25 The  $^{13}\text{C}$  DEPT135 NMR spectrum of epigallocatechin (4)

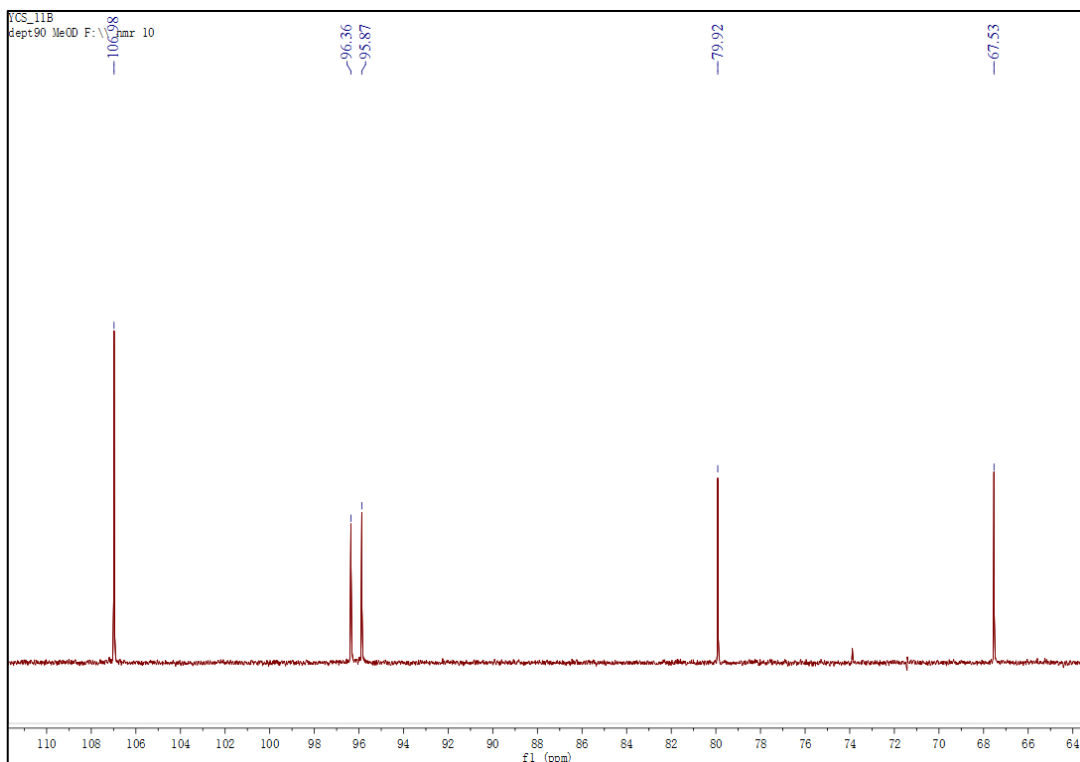

Fig.S26 The  $^{13}\text{C}$  DEPT90 NMR spectrum of epigallocatechin (4)

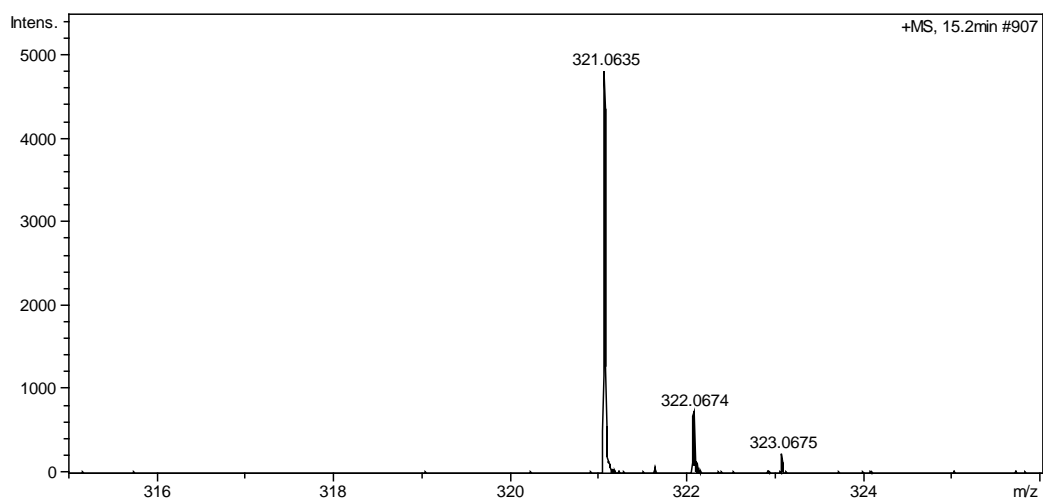

Fig.S27 The HRESIMS spectrum of Taxifolin (5)

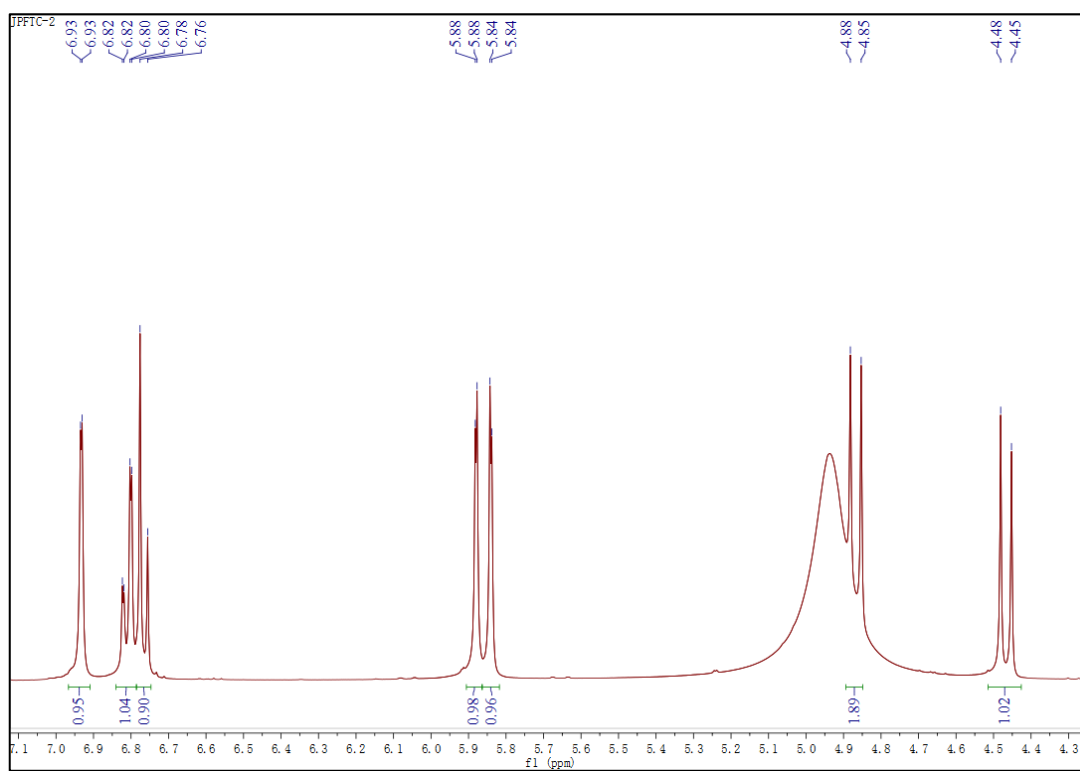

Fig.S28 The <sup>1</sup>H NMR spectrum of Taxifolin (5)

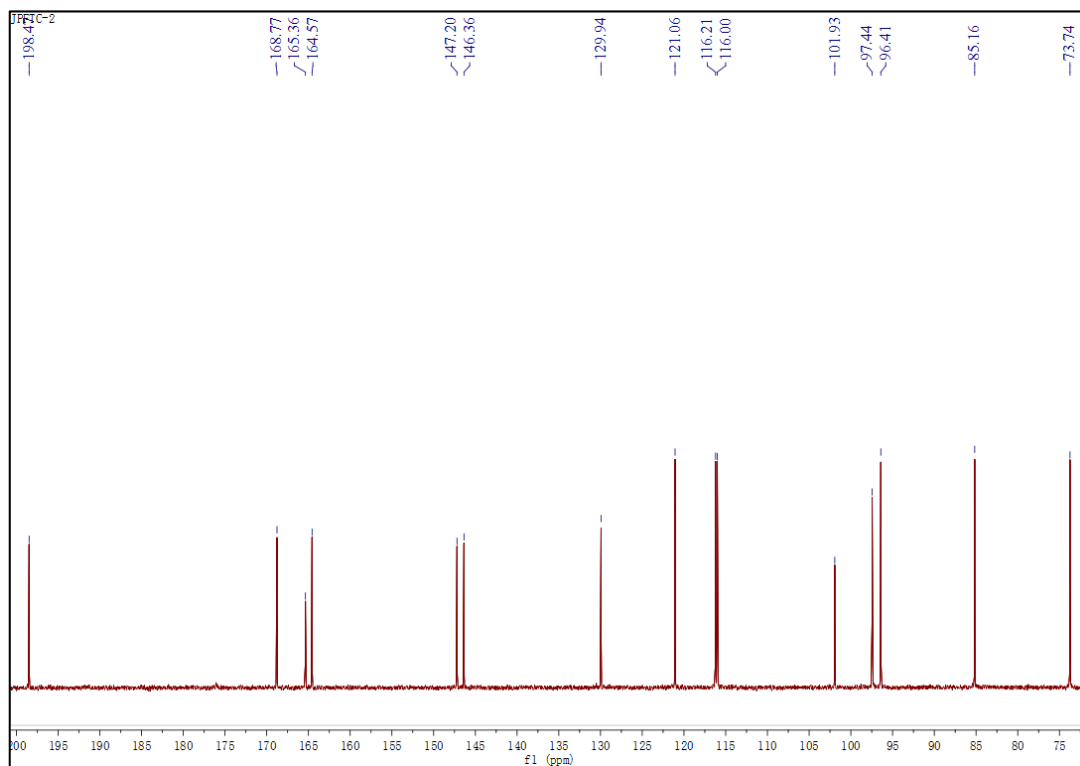

Fig.S29 The  $^{13}\text{C}$  NMR spectrum of Taxifolin (5)

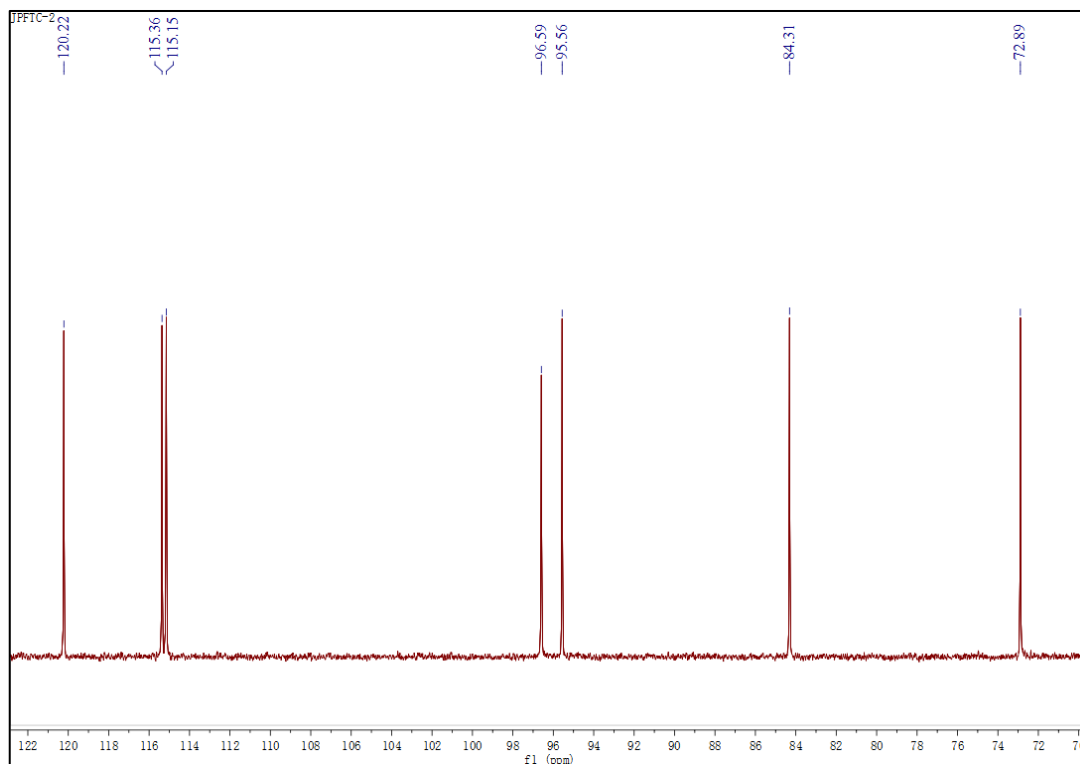

Fig.S30 The  $^{13}\text{C}$  DEPT135 NMR spectrum of Taxifolin (5)

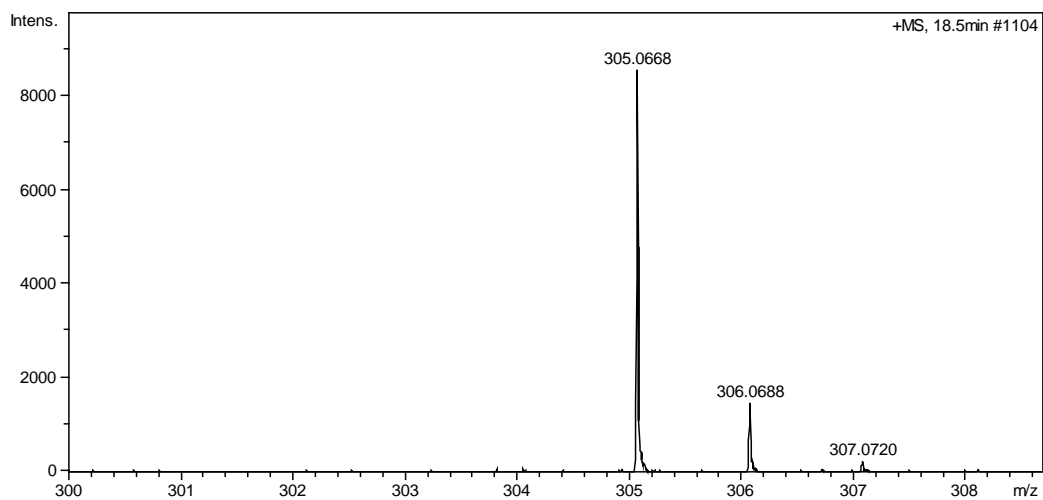

Fig.S31 The HRESIMS spectrum of dihydromyricetin (6)

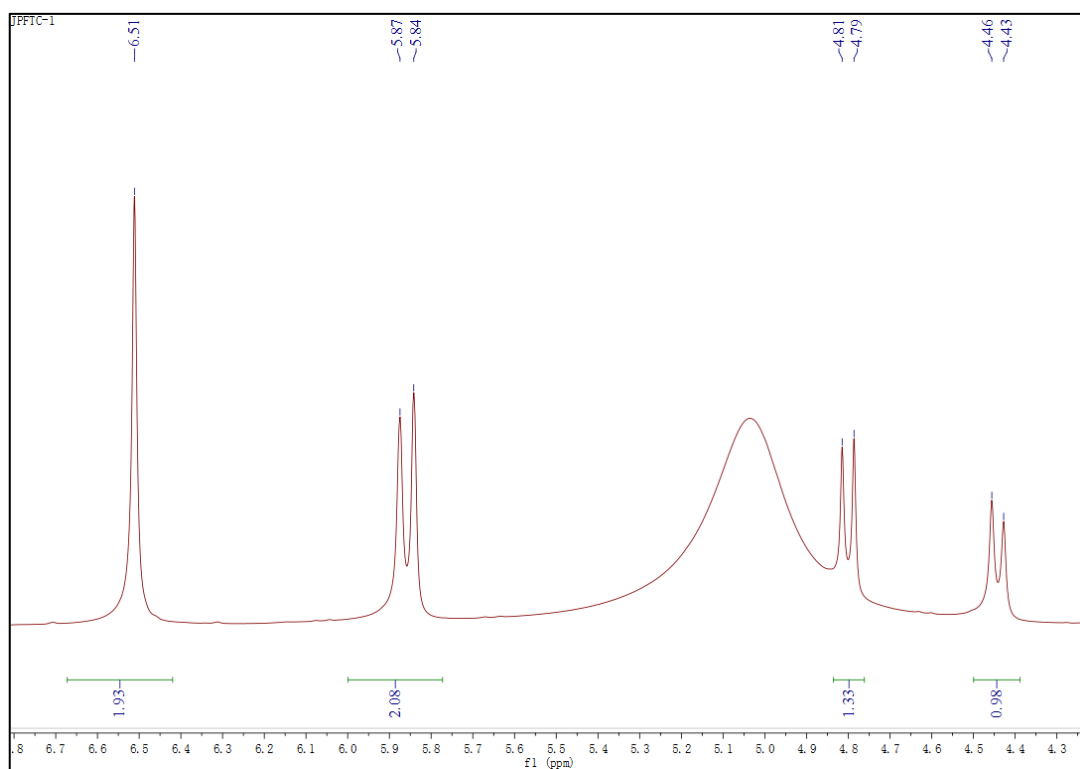

Fig.S32 The <sup>1</sup>H NMR spectrum of dihydromyricetin (6)

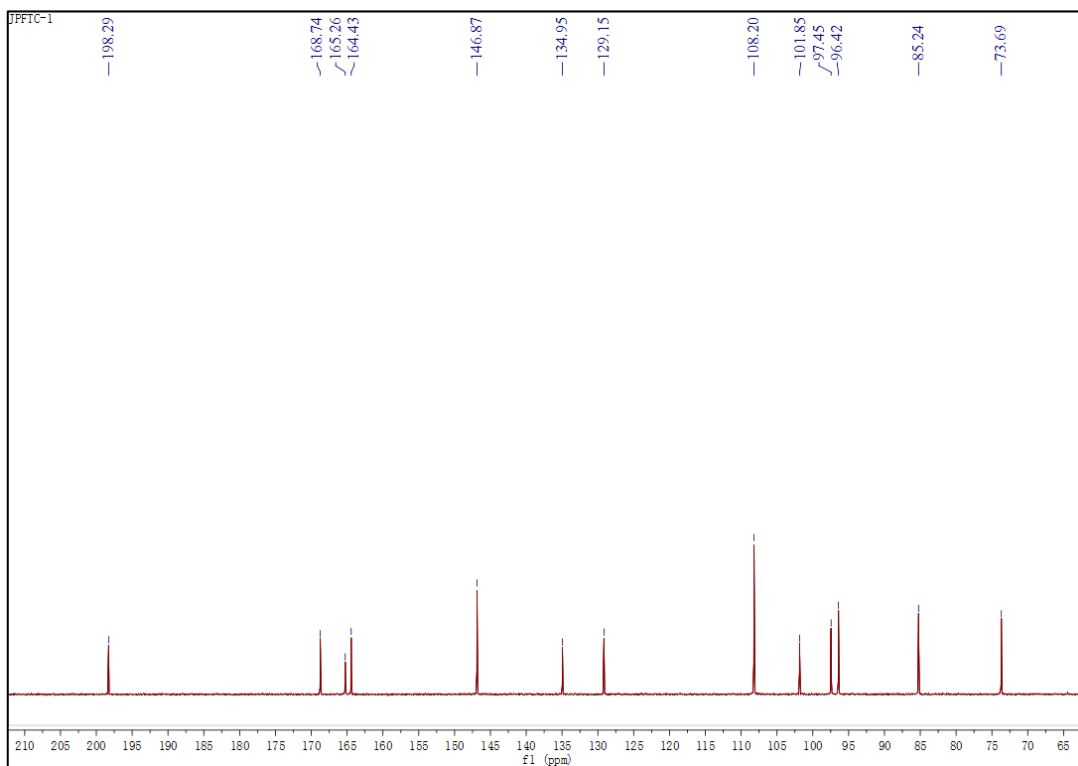

Fig.S33 The  $^{13}\text{C}$  NMR spectrum of dihydromyricetin (6)

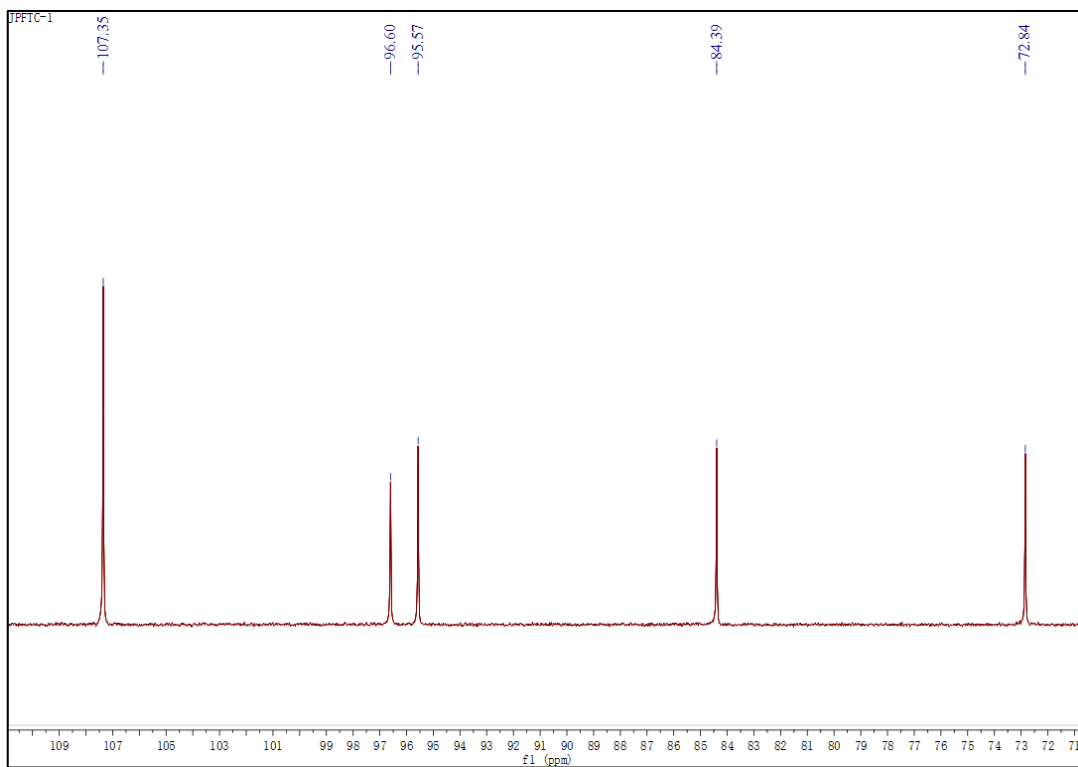

Fig.S34 The  $^{13}\text{C}$  DEPT135 NMR spectrum of dihydromyricetin (6)

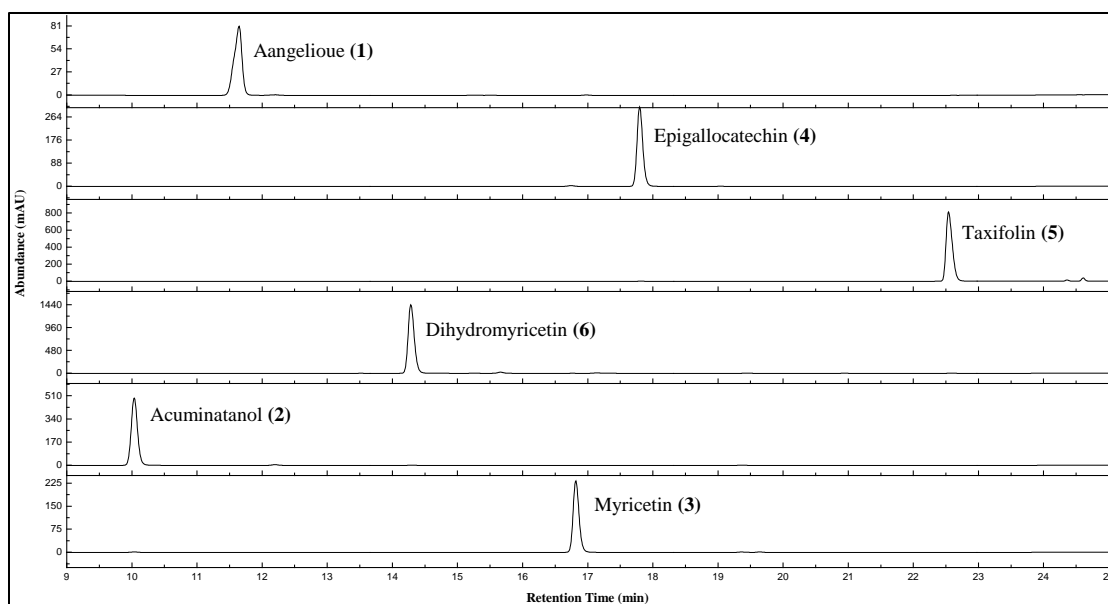

Fig. S35 HPLC Chromatogram of the isolated compound 1-6 from *A. grossedentata* callus

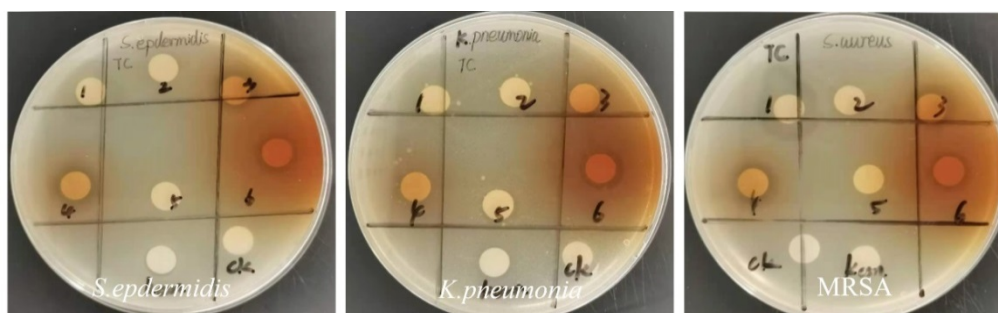

Fig.S36 Antibacterial activity of compound 1-6 using disc diffusion assay

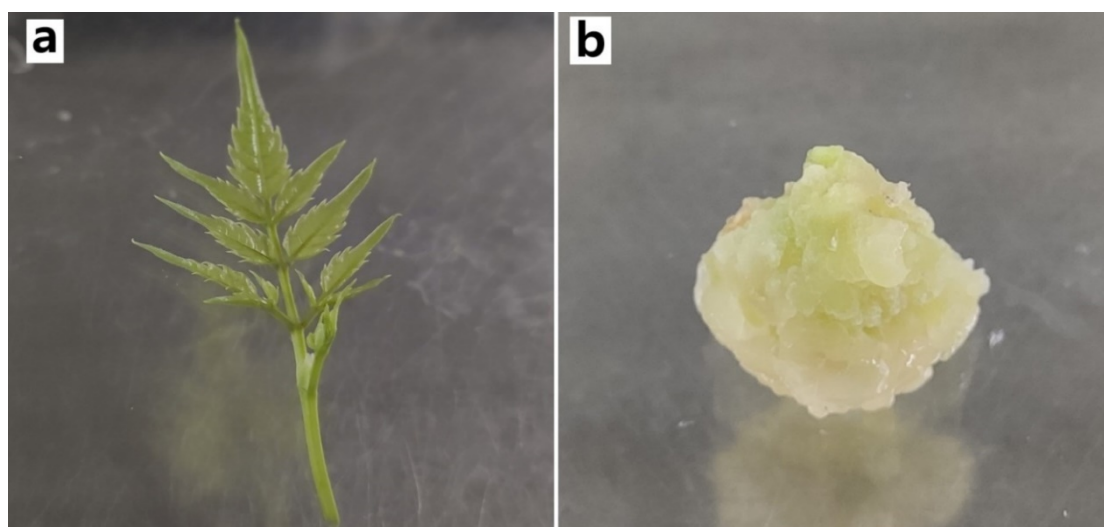

Fig. 37 The tender shoots and the induced calluses of *A. grossedentata*, (a) The tender shoot tip of *A. grossedentata*. (b) The calluses of *A. grossedentata*
